# Supplementary material
Source: ML conference proceedings conference paper supplement (https://proceedings.neurips.cc/paper_files/paper/2023/hash/f8f78f8043f35890181a824e53a57134-Abstract.html)
Supplement: Supplementary file 1 [file f8f78f8043f35890181a824e53a57134-Supplemental-Conference.pdf]

## A Supplementary Material

### A.1 Training Details

To ensure stable training, we applied gradient clipping with a maximum norm of 1.0 and used the Adam optimizer with  $\beta_1 = 0.9$ ,  $\beta_2 = 0.98$  (Kingma & Ba (2015)). We used the built-in polynomial decay learning rate scheduler in MetaSeq with 500 warmup updates and the end learning rate set to 0. All models are trained with pre-norm and using ReLU activation. We apply a dropout of 0.1 throughout, but we do not apply any dropout to embeddings. We also use weight decay of 0.1. To initialize the weights, we use a variant based on Megatron-LM codebase, which involves using a normal distribution with a mean of zero and a standard deviation of 0.006. We truncate this normal distribution within two standard deviations and observed substantial gain in both training stability and performance.

### A.2 Motivation

**Why is the local model needed?** Many of the efficiency advantages of the MEGABYTE design could be realized with the Global model alone, which would resemble a decoder version of ViT (Dosovitskiy et al., 2020). However, the joint distribution over the patch  $p(x_{t+1}, \dots, x_{t+P} | x_{0..t})$  has an output space of size  $256^P$  so direct modeling is only tractable for very small patches. We could instead factor the joint distribution into conditionally independent distributions  $p(x_{t+1} | x_{0..t}) \dots p(x_{t+P} | x_{0..t})$ , but this would greatly limit the model’s expressive power. For example, it would be unable to express a patch distribution such as 50% *cat* and 50% *dog*, and would instead have to assign probability mass to strings such as *cag* and *dot*. Instead, our autoregressive Local model conditions on previous characters within the patch, allowing it to only assign probability to the desired strings.

**Increasing Parameters for Fixed Compute** Transformer models have shown consistent improvements with parameter counts (Kaplan et al., 2020). However, the size of models is limited by their increasing computational cost. MEGABYTE allows larger models for the same cost, both by making self attention sub-quadratic, and by using large feedforward layers across patches rather than individual tokens.

**Re-use of Established Components** MEGABYTE consists of two transformer models interleaved with shifting, reshaping and a linear projection. This re-use increases the likelihood that the architecture will inherit the desirable scaling properties of transformers.

### A.3 Model Details

As discussed in Section 4, we conduct experiments using a fixed compute and data budget across all models to focus our comparisons solely on the model architecture rather than training resources. To achieve this, we adjust model hyperparameters within each architecture so that the time taken for a single update is matched and then train all models for the same number of updates. We list all of model details in Table 8 and Table 9.

|    | Model | #L | $d_{\text{model}}$ | #H | $d_{\text{head}}$ |
|----|-------|----|--------------------|----|-------------------|
| S1 | 125M  | 12 | 768                | 12 | 64                |
| S2 | 350M  | 24 | 1024               | 16 | 64                |
| S3 | 760M  | 24 | 1536               | 16 | 96                |
| S4 | 1.3B  | 24 | 2048               | 32 | 64                |
| S5 | 2.7B  | 32 | 2560               | 32 | 80                |
| S6 | 6.7B  | 32 | 4096               | 32 | 128               |

Table 8: **Common Model architecture details by size.** For each model size, we show the number of layers (#L), the embedding size ( $d_{\text{model}}$ ), the number of attention heads (#H), the dimension of each attention head ( $d_{\text{head}}$ ).

| Model                              | (Global) Size       | Local Size          | BS   | LR       | Context Length (in bytes)  |
|------------------------------------|---------------------|---------------------|------|----------|----------------------------|
| arXiv                              |                     |                     |      |          |                            |
| Transformer                        | 320M (D=1024, L=22) | N/A                 | 72   | 2.00E-04 | 1,024                      |
| Perceiver AR                       | 248M (D=1024, L=17) | N/A                 | 72   | 2.00E-04 | 8,192 (1024 latents)       |
| MEGABYTE                           | 758M (D=2048, L=14) | 262M (D=1024, L=18) | 48   | 2.00E-04 | 8,192 (patch size 8)       |
| <i>w/o Local model</i>             | 2.3B (D=2560, L=20) | N/A                 | 48   | 1.50E-04 | 8,192 (patch size 4)       |
| <i>w/o global model</i>            | N/A                 | 350M (D=1024, L=24) | 192  | 2.00E-04 | 8,192 (patch size 8)       |
| <i>w/o cross-patch Local model</i> | 921M (D=2048, L=17) | 350M (D=1024, L=24) | 48   | 2.00E-04 | 8,192 (patch size 8)       |
| <i>w/ CNN encoder</i>              | 704M (D=2048, L=13) | 262M (D=1024, L=18) | 48   | 2.00E-04 | 8,192 (patch size 8)       |
| Image task 64 (Table 2)            |                     |                     |      |          |                            |
| MEGABYTE                           | 2.7B (D=2560, L=32) | 350M (D=1024, L=24) | 2    | 2.00E-04 | 12,288 (patch size 12)     |
| Image task 64 (Table 4)            |                     |                     |      |          |                            |
| Transformer                        | 760M (D=1536, L=24) | N/A                 | 512  | 3.00E-04 | 2,048                      |
| Perceiver AR                       | 227M (D=1024, L=16) | N/A                 | 512  | 3.00E-04 | 12,288 (1024 latents)      |
| MEGABYTE                           | 1.3B (D=2048, L=24) | 1.3B (D=2048, L=24) | 256  | 3.00E-04 | 12,288 (patch size 12)     |
| Image task 256                     |                     |                     |      |          |                            |
| Transformer                        | 62M (D=768, L=6)    | N/A                 | 1536 | 2.00E-04 | 1,024                      |
| Perceiver AR                       | 62M (D=768, L=6)    | N/A                 | 256  | 2.00E-04 | 8,192 (768 latents)        |
| MEGABYTE                           | 125M (D=768, L=12)  | 125M (D=768, L=12)  | 16   | 2.00E-04 | 196,608 (patch size 192)   |
| <i>w/o local model</i>             | 2.7B (D=4096, L=32) | N/A                 | 16   | 2.00E-04 | 196,608 (patch size 48)    |
| <i>w/o global model</i>            | 125M (D=768, L=12)  | 125M (D=768, L=12)  | 16   | 2.00E-04 | 196,608 (patch size 192)   |
| <i>w/o cross-patch Local model</i> | 250M                | 156M (D=768, L=15)  | 16   | 2.00E-04 | 196,608 (patch size 192)   |
| <i>w/ CNN encoder</i>              | 125M (D=768, L=12)  | 125M (D=768, L=12)  | 16   | 2.00E-04 | 196,608 (patch size 192)   |
| Image task 640                     |                     |                     |      |          |                            |
| Transformer                        | 83M (D=768, L=8)    | N/A                 | 4800 | 3.00E-04 | 1,024                      |
| Perceiver AR                       | 62M (D=768, L=6)    | N/A                 | 2048 | 3.00E-04 | 4,096 (1024 latents)       |
| MEGABYTE                           | 125M (D=768, L=12)  | 83M (D=768, L=8)    | 32   | 3.00E-04 | 1,228,800 (192 patch size) |
| audio                              |                     |                     |      |          |                            |
| Transformer                        | 135M (D=768, L=13)  | N/A                 | 2048 | 2.00E-04 | 1024                       |
| Perceiver AR                       | 62M (D=768, L=6)    | N/A                 | 384  | 2.00E-04 | 8,192 (1024 latents)       |
| MEGABYTE                           | 350M (D=1024, L=24) | 125M (D=768, L=12)  | 256  | 2.00E-04 | 524,288 (32 patch size)    |
| <i>w/o local model</i>             | 2.7B (D=4096, L=32) | 125M (D=768, L=12)  | 256  | 2.00E-04 | 524,288 (32 patch size)    |
| <i>w/o global model</i>            | 350M (D=1024, L=24) | 125M (D=768, L=12)  | 256  | 2.00E-04 | 524,288 (32 patch size)    |
| <i>w/o cross-patch Local model</i> | 350M (D=1024, L=24) | 146M (D=768, L=14)  | 256  | 2.00E-04 | 524,288 (32 patch size)    |
| <i>w/ CNN encoder</i>              | 350M (D=1024, L=24) | 125M (D=768, L=12)  | 256  | 2.00E-04 | 524,288 (32 patch size)    |

Table 9: **Model architecture details.** We report the model size, the embedding size (D), number of layers (L), total batch size (BS), learning rate (LR), and context length. When we vary the number of model layers from the standard amount for the given size (Table 8), we note this accordingly. For PerceiverAR models, we note the number of latents used, and for MEGABYTE models we note the patch sizes.

## B Pseudocode

Listing 1: Pseudocode of Megabyte model

```

519
520 class MegaByteDecoder:
521     def __init__(
522         self,
523         global_args,
524         local_args,
525         patch_size,
526     ):
527         self.pad = 0
528         self.patch_size = patch_size
529         self.globalmodel = TransformerDecoder(global_args)
530         self.localmodel = TransformerDecoder(local_args)
531
532     def forward(
533         self,
534         bytes,
535     ):
536         bytes_global, bytes_local = self.prepare_input(bytes)
537

```

```

538     global_bytes_embedded = self.globalmodel.embed(bytes_global)
539     global_in = rearrange(
540         global_bytes_embedded,
541         "b (t p) e -> b t (p e)",
542         p=self.patch_size,
543     )
544     global_output = self.globalmodel(global_in)
545
546     global_output_reshaped = rearrange(
547         global_output,
548         "b t (p e) -> (b t) p e",
549         p=self.patch_size,
550     )
551     local_bytes_embedded = self.localmodel.embed(bytes_local)
552     local_in = local_bytes_embedded + global_output_reshaped
553     local_output = self.localmodel(local_in)
554
555     batch_size = bytes_global.shape[0]
556     x = rearrange(local_output, "(b t) l v -> b (t l) v", b=
557         batch_size)
558     return x
559
560     def prepare_input(self, bytes):
561         padding_global = bytes.new(bytes.shape[0], self.patch_size).
562             fill_(self.pad)
563         bytes_global = torch.cat((padding_global, bytes[:, :, -self.
564             patch_size:]), -1)
565
566         bytes_input = rearrange(bytes, "b (t p) -> (b t) p", p=self.
567             patch_size)
568         padding_local = bytes_input.new(bytes_input.shape[0], 1).fill_
569             (self.pad)
570         bytes_local = torch.cat((padding_local, bytes_input[:, :, -1]),
571             -1)
572
573         return bytes_global, bytes_local

```

## 574 C PerceiverAR Implementation

575 To reproduce PerceiverAR in a compute-controlled setting we extended the standard transformer  
576 implementation in metaseq with an additional cross attention layer to compute the latents and match  
577 the architecture of PerceiverAR. We trained the model by sampling random spans from each text,  
578 matching the procedure used in the PerceiverAR codebase. To be consistent with the original work,  
579 we use sliding window evaluation with a stride of  $num\_latents/2$  unless otherwise noted. In several  
580 cases we used the standard metaseq implementation as opposed to specific techniques reported in  
581 the original paper: 1) we used standard attention dropout instead of cross-attention dropout 2) We  
582 did not implement chunked attention. We verified our implementation by reproducing the "Standard  
583 Ordering" experiments in Table 5 of the Perceiver AR paper. After carefully matching context size,  
584 number of latents, the amount of data and training steps used and learning rate, we achieved 3.53 bpb  
585 vs 3.54 reported in the original paper.

## 586 D More results

### 587 D.1 Patch scan Implementation

588 Images have a natural structure, containing a grid of  $n \times n$  pixels each composed of 3 bytes  
589 (corresponding to color channels). We explore two ways of converting images to sequences for  
590 modeling (see Figure 8). Firstly, *raster scan* where the pixels are linearized into 3 bytes and  
591 concatenated row-by-row. Secondly, *patch scan* where we create patches of shape  $p \times p \times 3$  bytes

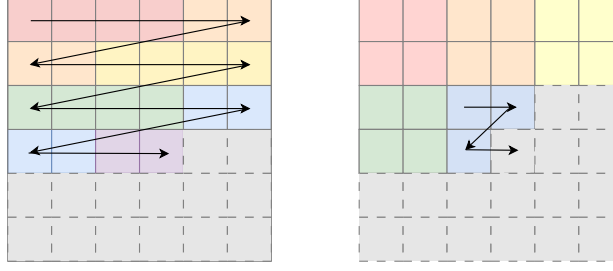

Figure 8: Two ways to model 2D data sequentially. Left, raster scan, by taking bytes row by row and left to right; right, patch scan, where we first split an image into patches, and do raster scan across patches and within a patch. (T=36, K=9, P=4).

where  $p = \sqrt{\frac{P}{3}}$ , and then use a raster scan both within and between patches. Unless otherwise specified, MEGABYTE models use *patch scan* for image data.

## D.2 Patch scan vs Raster scan

The patch scan method is inspired by recent works in Vision Transformers (Dosovitskiy et al., 2020), and it is more effective than raster scan for modeling image sequencing. We found it improves both MEGABYTE and Perceiver AR.

|                            | (Global) Size      | Local Size         | context                  | bpb   |
|----------------------------|--------------------|--------------------|--------------------------|-------|
| MEGABYTE (patch scan)      | 62M (D=768, L=6)   | N/A                | 8,192 (768 latents)      | 3.158 |
| MEGABYTE (raster scan)     | 62M (D=768, L=6)   | N/A                | 8,192 (768 latents)      | 3.428 |
| Perceiver AR (patch scan)  | 125M (D=768, L=12) | 125M (D=768, L=12) | 196,608 (patch size 192) | 3.373 |
| Perceiver AR (raster scan) | 125M (D=768, L=12) | 125M (D=768, L=12) | 196,608 (patch size 192) | 3.552 |

Table 10: ImageNet256 performance with patch scan vs raster scan for MEGABYTE and Perceiver AR.

## D.3 Longer sequence modeling

For our pg19 scaling experiment, we also use longer context length for MEGABYTE. The results are shown in Table II. With longer sequence, we didn't observe further improvement, consistent with findings in Hawthorne et al. (2022). We think we will benefit more from longer sequence when we further scale up the model size and data.

|          | context               | bpb    |
|----------|-----------------------|--------|
| MEGABYTE | 8,192 (patch size 8)  | 0.8751 |
| MEGABYTE | 16,384 (patch size 8) | 0.8787 |

Table 11: Longer sequence for PG19 dataset. For both experiments, we set global model as 1.3b, local model as 350m, and MEGABYTE patch size as 8.
